# Supplementary material for: Diverse Forms of RPS9 Splicing Are Part of an Evolving Autoregulatory Circuit
Source: PubMed Central journal article supplement (PMC3315480; doi:10.1371/journal.pgen.1002620), 2012-03-29

*Homo sapiens* (human)

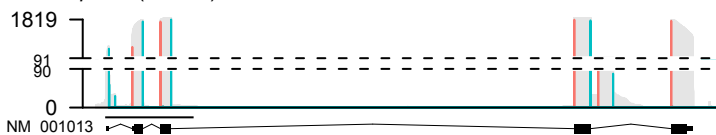

*Mus musculus* (mouse)

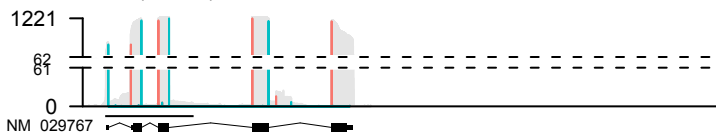

*Rattus norvegicus* (rat)

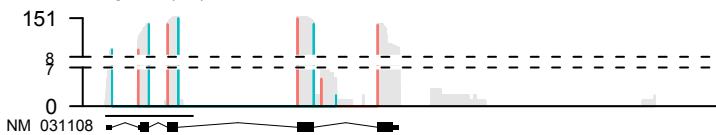

*Xenopus tropicalis* (frog)

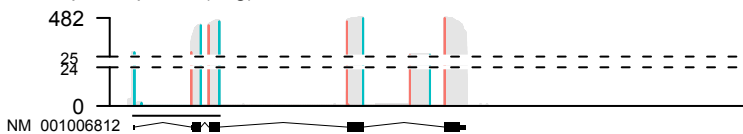

*Oryzias latipes* (medaka)

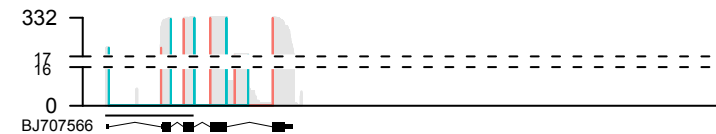

*Danio rerio* (zebrafish)

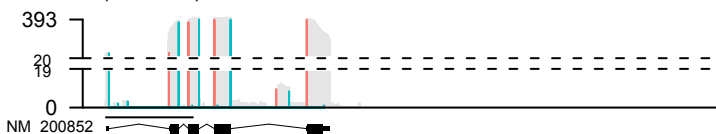

*Petromyzon marinus* (lamprey)

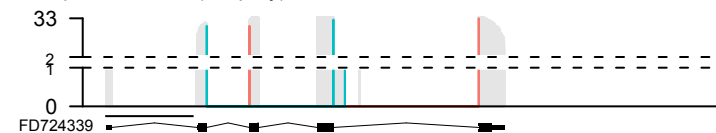

*Branchiostoma floridae* (lancelet)

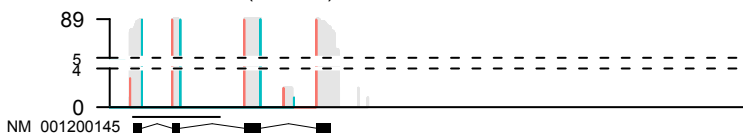

*Ciona intestinalis* (sea squirt)

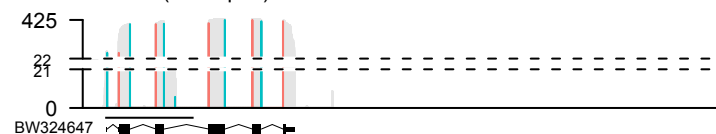

*Drosophila melanogaster* (fly)

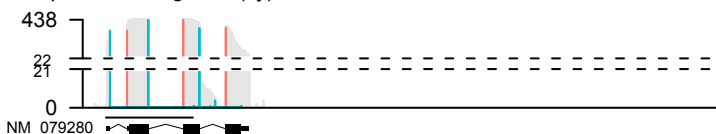

Supplement: pgen.1002620.s001.pdf [file pgen.1002620.s001.pdf]
