# Supplementary material for: Diverse Forms of RPS9 Splicing Are Part of an Evolving Autoregulatory Circuit
Source: PubMed Central journal article supplement (PMC3315480; doi:10.1371/journal.pgen.1002620), 2012-03-29

# RPS14

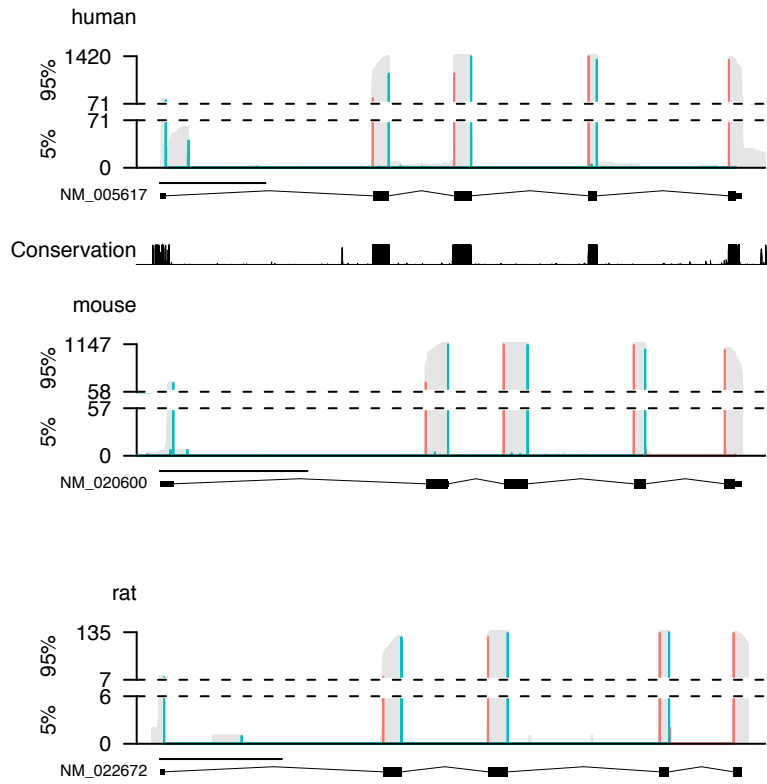

# RPL30

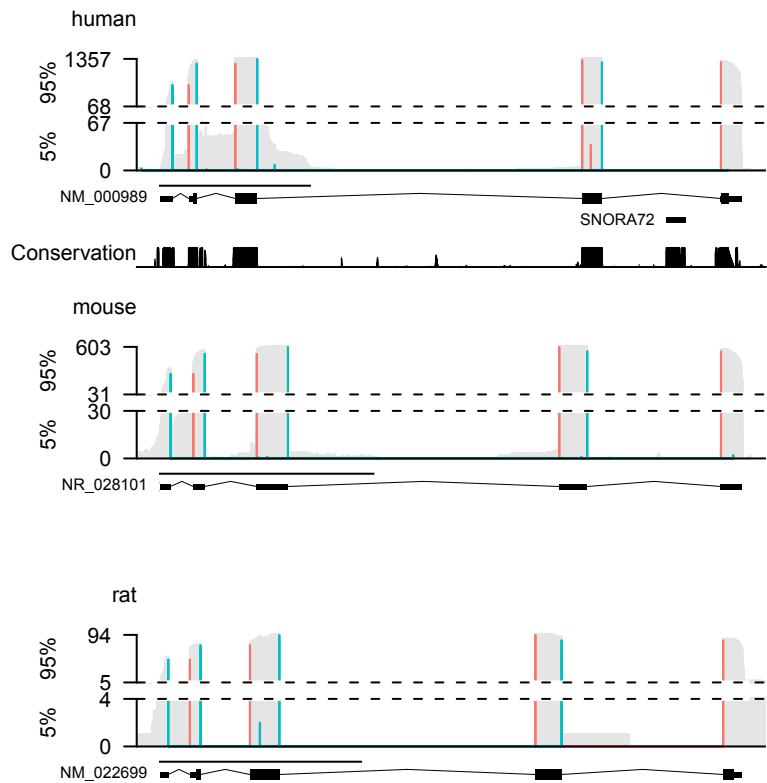

Supplement: pgen.1002620.s003.pdf [file pgen.1002620.s003.pdf]
