# Supplementary material for: Diverse Forms of RPS9 Splicing Are Part of an Evolving Autoregulatory Circuit
Source: PubMed Central journal article supplement (PMC3315480; doi:10.1371/journal.pgen.1002620), 2012-03-29
Supplement: pgen.1002620.s005.pdf [file pgen.1002620.s005.pdf]

| Gene.1  | Gene.2  | Name.1 | Name.2 | Gene class | Calb | Lklu | Lthe | Lwal | Egos | Klac | Zrou | Vpol | Ncas | Cgla | Sbay | Scer | preWGD Ancestor |
|---------|---------|--------|--------|------------|------|------|------|------|------|------|------|------|------|------|------|------|-----------------|
| YCL040W | YDR516C | GLK1   | MYO5   | non-RPG    |      |      |      |      |      |      |      |      |      |      |      |      | 0               |
| YCL043C | YDR518W | PDI1   | FOL3   | non-RPG    |      |      |      |      |      |      |      |      |      |      |      |      | 0               |
| YCR067C | YNR026C | SED4   | MGR3   | non-RPG    |      |      |      |      |      |      |      |      |      |      |      |      | 0               |
| YCR069W | YNR028W | CPR4   |        | non-RPG    |      |      |      |      |      |      |      |      |      |      |      |      | 0               |
| YCR094W | YNR048W | CDC50  |        | non-RPG    |      |      |      |      |      |      | ■    |      |      |      |      |      | 0               |
| YDL021W | YOL056W | GPM2   | VHS3   | non-RPG    |      |      |      |      |      |      | ■    |      |      |      |      |      | 0               |
| YDL109C | YGL144C |        | VBA3   | non-RPG    |      | ■    |      |      | ■    |      | ■    |      |      |      |      |      | 0               |
| YDL161W | YLR206W | ENT1   | PSR2   | non-RPG    |      |      |      |      |      |      |      |      |      |      | ■    |      | 0               |
| YDL211C | YNL176C |        | SPH1   | non-RPG    |      |      |      |      |      |      |      |      |      |      |      |      | 0               |
| YDR028C | YBR050C | REG1   | FRE2   | non-RPG    |      | ■    |      |      | ■    |      |      |      | ■    |      |      |      | 0               |
| YDR066C | YER139C | RTR2   | SAM3   | non-RPG    |      |      |      |      |      |      |      | ■    |      |      | ■    |      | 0               |
| YDR146C | YLR131C | SWI5   |        | non-RPG    |      |      |      |      |      |      |      |      |      |      |      |      | 0               |
| YDR213W | YLR228C | UPC2   | IDP3   | non-RPG    |      |      |      |      |      |      |      |      |      |      |      |      | 0               |
| YDR247W | YPL026C | VHS1   | HEF3   | non-RPG    |      |      |      |      |      |      |      |      |      |      |      |      | 0               |
| YDR253C | YPL038W | MET32  | LCB4   | non-RPG    |      |      |      |      |      |      |      |      |      |      |      |      | 0               |
| YDR263C | YOR033C | DIN7   | YRR1   | non-RPG    |      | ■    |      | ■    |      |      |      | ■    |      |      |      |      | 0               |
| YDR264C | YOR034C | AKR1   | GAC1   | non-RPG    |      |      |      |      |      |      |      |      |      |      |      |      | 0               |
| YDR368W | YOR120W | YPR1   | DCI1   | non-RPG    |      |      |      |      |      |      |      |      |      |      |      |      | 0               |
| YDR379W | YOR127W | RGA2   | CMP2   | non-RPG    |      |      |      |      |      |      |      |      |      |      |      |      | 0               |
| YDR441C | YML022W | APT2   | ORC1   | non-RPG    |      |      |      |      |      |      |      |      |      |      |      |      | 0               |
| YDR490C | YOL100W | PKH1   | HMG1   | non-RPG    |      |      |      |      |      |      |      |      |      |      |      |      | 0               |
| YEL022W | YJR031C | GEA2   |        | non-RPG    |      |      |      |      |      |      |      |      |      |      |      |      | 0               |
| YEL030W | YJR045C | ECM10  |        | non-RPG    |      |      |      |      |      |      |      |      |      |      |      |      | 0               |
| YER045C | YIL036W | ACA1   | URA10  | non-RPG    |      |      |      |      |      |      |      |      |      |      |      |      | 0               |
| YER081W | YIL074C | SER3   | BUL1   | non-RPG    |      |      |      |      |      |      |      |      |      |      |      |      | 0               |
| YER129W | YGL179C | SAK1   | NGL2   | non-RPG    |      |      |      |      |      |      |      |      |      |      |      |      | 0               |
| YER132C | YGL197W | PMD1   | PLB3   | non-RPG    |      |      |      |      | ■    |      | ■    |      |      |      |      |      | 0               |
| YFR015C | YLR258W | GSY1   | GRE1   | non-RPG    |      |      |      |      | ■    |      | ■    |      |      |      |      |      | 0               |
| YGL071W | YPL202C | AFT1   | CET1   | non-RPG    |      |      |      |      |      |      |      |      |      |      |      |      | 0               |
| YGL075C | YPL200W | MPS2   |        | non-RPG    |      |      |      |      |      |      |      |      |      |      |      |      | 0               |
| YGL096W | YPL177C | TOS8   | SSO1   | non-RPG    |      |      |      |      |      |      |      |      |      |      |      |      | 0               |
| YGL166W | YPR008W | CUP2   | GYP5   | non-RPG    |      |      |      |      |      |      |      |      |      |      |      |      | 0               |
| YGR004W | YLR324W | PEX31  | VIK1   | non-RPG    |      |      |      |      |      |      |      |      |      |      |      |      | 0               |
| YGR023W | YLR332W | MTL1   | CLN2   | non-RPG    |      |      |      |      |      |      |      |      |      |      |      |      | 0               |
| YGR142W | YPR158W | BTN2   | DDR2   | non-RPG    |      |      |      |      |      |      |      |      |      |      |      |      | 0               |
| YGR192C | YJR009C | TDH3   |        | non-RPG    |      |      |      |      |      |      |      |      |      |      |      |      | 0               |
| YGR230W | YHR152W | BNS1   | QDR1   | non-RPG    |      |      |      |      |      |      |      |      |      |      |      |      | 0               |
| YGR239C | YHR160C | PEX21  | VPS21  | non-RPG    |      |      |      |      |      |      |      |      |      |      |      |      | 0               |
| YHL003C | YKL008C | LAG1   | CAN1   | non-RPG    | ■    |      |      |      |      |      |      |      |      |      |      |      | 0               |
| YHL017W | YKL039W |        | WSC3   | non-RPG    |      |      |      |      |      |      |      |      |      | ■    |      |      | 0               |
| YHL035C | YLL048C | VMR1   | MSB4   | non-RPG    |      |      |      |      |      |      |      |      |      |      |      |      | 0               |
| YHR096C | YDR345C | HXT5   | SKM1   | non-RPG    |      |      |      |      |      |      |      |      |      |      |      |      | 0               |
| YHR139C | YNL160W | SPS100 | PAP2   | non-RPG    |      |      |      |      |      |      |      |      |      |      |      |      | 0               |
| YIR018W | YOL028C | YAP5   |        | non-RPG    |      |      |      |      |      |      |      |      |      |      |      |      | 0               |
| YJL098W | YKR028W | SAP185 | ERP2   | non-RPG    |      |      |      |      |      |      |      |      |      |      |      |      | 0               |
| YJL099W | YKR027W | CHS6   | PDR15  | non-RPG    |      |      |      |      |      |      |      |      | ■    |      |      |      | 0               |
| YJL112W | YKR036C | MDV1   |        | non-RPG    |      |      |      |      | ■    |      |      |      |      |      |      |      | 0               |
| YJL133W | YKR052C | MRS3   | ODC1   | non-RPG    |      |      |      |      |      |      |      |      |      |      |      |      | 0               |
| YJL134W | YKR053C | LCB3   | ISU1   | non-RPG    |      |      |      |      |      |      |      |      |      |      |      |      | 0               |
| YJL138C | YKR059W | TIF2   | MKK2   | non-RPG    |      |      |      |      |      |      |      |      |      |      |      |      | 0               |
| YJL159W | YKL163W | HSP150 | SVS1   | non-RPG    |      |      |      |      |      |      |      |      |      |      |      |      | 0               |
| YJL160C | YKL164C |        | FRE4   | non-RPG    |      | ■    |      |      | ■    |      | ■    |      |      |      |      |      | 0               |
| YJR091C | YPR042C | JSN1   | PEX27  | non-RPG    |      |      |      |      |      |      |      |      |      |      |      |      | 0               |
| YJR127C | YML081W | RSF2   |        | non-RPG    |      |      |      |      |      |      |      |      |      |      |      |      | 0               |
| YJR130C | YML082W | STR2   | ICY1   | non-RPG    |      |      | ■    |      | ■    |      |      |      |      |      |      |      | 0               |
| YJR148W | YHR208W | BAT2   | RIF2   | non-RPG    |      |      |      |      |      |      |      |      |      |      |      |      | 0               |
| YKL050C | YMR031C |        | PSK2   | non-RPG    |      |      |      |      |      |      |      | ■    |      |      |      |      | 0               |
| YKL062W | YMR037C | MSN4   | MYO2   | non-RPG    | ■    |      |      |      |      |      |      | ■    |      |      |      |      | 0               |
| YKL068W | YMR047C | NUP100 |        | non-RPG    |      |      |      |      |      |      |      |      | ■    |      |      |      | 0               |
| YKL126W | YMR104C | YPK1   | DOT6   | non-RPG    |      |      |      |      |      |      |      |      | ■    |      |      |      | 0               |
| YKR077W | YOR066W | MSA2   | SSA4   | non-RPG    |      |      |      |      |      |      |      |      | ■    |      |      |      | 0               |
| YLR293C | YOR185C | GSP1   |        | non-RPG    |      |      |      |      |      |      |      |      | ■    |      |      |      | 0               |

| Gene.1    | Gene.2    | Name.1 | Name.2 | Gene class | Calb | Lklu | Lthe | Lwal | Egos | Klac | Zrou | Vpol | Ncas | Cgla | Sbay | Scer | preWGD Ancestor |
|-----------|-----------|--------|--------|------------|------|------|------|------|------|------|------|------|------|------|------|------|-----------------|
| YML125C   | YML087C   | PGA3   | MRH1   | non-RPG    |      |      | █    |      |      |      |      | █    |      |      |      |      | 0               |
| YMR119W   | YNL008C   | ASI1   | TEF1   | non-RPG    |      |      | █    |      |      |      |      | █    |      |      |      |      | 0               |
| YMR206W   | YNR014W   |        | SUR1   | non-RPG    |      |      |      |      | █    |      | █    |      | █    |      |      |      | 0               |
| YNL095C   | YOR092W   |        | SYH1   | non-RPG    |      |      |      |      | █    |      |      |      | █    |      |      |      | 0               |
| YNL104C   | YOR108W   | LEU4   | UBX6   | non-RPG    |      |      |      |      |      |      |      |      | █    |      |      |      | 0               |
| YNL309W   | YOL131W   | STB1   | GIN4   | non-RPG    |      |      |      |      |      |      |      |      |      | █    |      |      | 0               |
| YNR034W-A | YCR075W-A |        | GNP1   | non-RPG    |      |      |      |      |      |      |      | █    |      |      |      |      | 0               |
| YOR227W   | YPL137C   | HER1   | GRX2   | non-RPG    |      |      |      |      |      |      |      | █    |      |      |      |      | 0               |
| YOR237W   | YPL145C   | HES1   | EMI2   | non-RPG    |      |      |      |      |      |      |      |      | █    |      |      |      | 0               |
| YOR256C   | YPL176C   | TRE2   | EUG1   | non-RPG    |      |      |      |      |      |      |      | █    |      |      |      |      | 0               |
| YDR077W   | YER150W   | SED1   | SEC12  | non-RPG    |      |      |      |      |      |      |      |      | █    |      |      |      | 0               |
| YDR343C   | YHR094C   | HXT6   | CPR8   | non-RPG    |      |      |      |      |      |      |      |      |      | █    |      |      | 0               |
| YGR197C   | YJR015W   | SNG1   |        | non-RPG    |      |      |      |      |      |      |      |      | █    |      |      |      | 0               |
| YIL013C   | YOR011W   | PDR11  | GPM3   | non-RPG    |      |      |      |      |      |      |      |      |      |      | █    |      | 0               |
| YKL093W   | YMR081C   | MBR1   | ROG1   | non-RPG    |      |      |      |      |      |      |      |      | █    |      |      |      | 0               |
| YFL059W   | YNL333W   | SNZ3   | ENT2   | non-RPG    |      |      |      |      |      |      |      |      | █    |      |      |      | 0               |
| YBL089W   | YER119C   | AVT5   | TDA7   | non-RPG    |      |      |      |      |      |      |      |      |      |      | █    |      | 0               |
| YCL050C   | YDR530C   | APA1   | REG2   | non-RPG    |      |      |      |      |      |      |      |      | █    |      |      |      | 0               |
| YDL022W   | YOL059W   | GPD1   | RTR1   | non-RPG    |      |      |      |      |      |      |      | █    |      |      |      |      | 0               |
| YDL214C   | YNL183C   | PRR2   | ACE2   | non-RPG    |      |      |      |      |      |      |      |      |      | █    |      |      | 0               |
| YDR272W   | YOR040W   | GLO2   | ECM22  | non-RPG    |      |      |      |      |      |      |      |      |      |      | █    |      | 0               |
| YDR524C-B | YCL048W-A |        | SKS1   | non-RPG    |      |      |      |      |      |      |      |      | █    |      |      |      | 0               |
| YER037W   | YGL224C   | PHM8   | MET31  | non-RPG    |      |      |      |      |      |      |      |      | █    |      |      |      | 0               |
| YGR035C   | YLR346C   |        | EXO1   | non-RPG    |      |      |      |      |      |      |      |      | █    |      |      |      | 0               |
| YGR221C   | YHR149C   | TOS2   | AKR2   | non-RPG    |      |      |      |      |      |      |      |      | █    |      |      |      | 0               |
| YGR279C   | YMR305C   | SCW4   | GCY1   | non-RPG    |      |      |      |      |      |      | █    |      |      | █    |      |      | 0               |
| YHR117W   | YNL121C   | TOM71  | RGA1   | non-RPG    |      |      |      |      |      |      |      | █    |      |      |      |      | 0               |
| YIL105C   | YNL047C   | SLM1   | APT1   | non-RPG    |      |      |      |      |      |      |      |      | █    |      |      |      | 0               |
| YIL156W   | YKR098C   | UBP7   | PKH2   | non-RPG    |      |      |      |      |      |      |      |      | █    |      |      |      | 0               |
| YJL105W   | YKR029C   | SET4   | GEA1   | non-RPG    |      |      |      |      |      |      |      | █    |      |      |      |      | 0               |
| YJL165C   | YKL168C   | HAL5   | SSC1   | non-RPG    |      |      |      |      |      |      |      |      |      |      | █    |      | 0               |
| YKR075C   | YOR062C   |        | CST6   | non-RPG    |      |      |      |      |      |      |      |      |      |      | █    |      | 0               |
| YLL012W   | YLR020C   | YEH1   | SER33  | non-RPG    |      |      |      |      |      |      |      | █    |      |      |      |      | 0               |
| YLR300W   | YOR190W   | EXG1   | TOS3   | non-RPG    |      |      |      |      |      |      |      | █    |      |      |      |      | 0               |
| YLR449W   | YML074C   | FPR4   | MDS3   | non-RPG    |      |      |      |      |      |      |      | █    |      |      |      |      | 0               |
| YML109W   | YMR273C   | ZDS2   | GSY2   | non-RPG    |      |      |      |      |      |      |      |      |      | █    |      |      | 0               |
| YMR177W   | YPL224C   | MMT1   | AFT2   | non-RPG    |      |      |      |      |      |      |      |      |      | █    |      |      | 0               |
| YMR186W   | YPL240C   | HSC82  | CSM4   | non-RPG    |      |      |      |      |      |      |      |      |      | █    |      |      | 0               |
| YDR252W   | YPL037C   | BTT1   | CUP9   | non-RPG    |      |      |      |      |      |      |      |      |      |      | █    |      | 0               |
| YIL085C   | YNL029C   | KTR7   | HAA1   | non-RPG    |      |      |      |      |      |      |      | █    |      |      |      |      | 0               |
| YAL023C   | YOR321W   | PMT2   | PEX30  | non-RPG    |      |      |      |      |      |      |      | █    |      |      |      |      | 0               |
| YAL038W   | YOR347C   | CDC19  | MID2   | non-RPG    |      |      |      |      |      |      |      |      | █    |      |      |      | 0               |
| YBL030C   | YBR085W   | PET9   | CUR1   | non-RPG    |      |      |      |      |      |      |      |      | █    |      |      |      | 0               |
| YBL056W   | YER089C   | PTC3   | TDH2   | non-RPG    |      |      |      |      | █    |      |      |      | █    |      |      |      | 0               |
| YBR024W   | YBR037C   | SCO2   | SPO12  | non-RPG    |      |      |      |      |      |      |      | █    |      |      |      |      | 0               |
| YBR121C   | YPR081C   | GRS1   | PEX18  | non-RPG    |      |      |      |      |      |      |      |      |      |      | █    |      | 0               |
| YBR140C   | YOL081W   | IRA1   | LAC1   | non-RPG    |      |      |      |      |      |      |      | █    |      |      |      |      | 0               |
| YBR147W   | YOL092W   | RTC2   | PTM1   | non-RPG    |      |      |      |      |      |      |      |      |      | █    |      |      | 0               |
| YBR169C   | YPL106C   | SSE2   | YBT1   | non-RPG    |      |      |      |      |      |      |      |      |      | █    |      |      | 0               |
| YBR197C   | YPL077C   |        | HXT3   | non-RPG    | █    | █    |      |      |      |      | █    | █    |      |      |      |      | 0               |
| YBR210W   | YGL054C   | ERV15  | YGP1   | non-RPG    |      |      |      |      | █    | █    |      |      |      | █    |      |      | 0               |
| YBR241C   | YGL104C   |        | YAP7   | non-RPG    |      |      |      |      | █    |      |      |      |      |      |      |      | 0               |
| YCL048W   | YDR522C   | SPS22  | SAP190 | non-RPG    |      |      |      |      |      |      |      | █    | █    |      |      |      | 0               |
| YCL051W   | YDR528W   | LRE1   | BCH2   | non-RPG    |      |      |      |      |      |      |      | █    |      |      |      |      | 0               |
| YCR005C   | YNR001C   | CIT2   | CAF4   | non-RPG    |      |      |      |      |      |      |      | █    |      |      |      |      | 0               |
| YCR034W   | YJL196C   | FEN1   | MRS4   | non-RPG    |      |      |      |      |      |      |      |      | █    |      |      |      | 0               |
| YCR037C   | YJL198W   | PHO87  | YSR3   | non-RPG    |      |      |      |      |      |      |      |      | █    |      |      |      | 0               |
| YCR073C   | YNR031C   | SSK22  | TIF1   | non-RPG    |      |      |      |      |      |      |      |      | █    |      |      |      | 0               |
| YDR122W   | YLR096W   | KIN1   | PIR3   | non-RPG    |      |      |      |      |      |      |      |      |      | █    |      |      | 0               |
| YDR185C   | YLR168C   | UPS3   | PIR1   | non-RPG    |      |      |      |      |      |      |      | █    |      |      |      |      | 0               |
| YDR200C   | YLR238W   | VPS64  | PUF2   | non-RPG    |      |      |      |      |      |      |      |      | █    |      |      |      | 0               |
| YDR273W   | YOR042W   | DON1   | TDA9   | non-RPG    |      |      |      |      |      |      |      |      | █    |      |      |      | 0               |



| Gene.1      | Gene.2      | Name.1 | Name.2     | Gene class | Calb | Lklu | Lthe | Lwal | Egos | Klac | Zrou | Vpol | Ncas | Cgla | Sbay | Scer | preWGD Ancestor |
|-------------|-------------|--------|------------|------------|------|------|------|------|------|------|------|------|------|------|------|------|-----------------|
| YKL201C     | YJR061W     | MNN4   | CIT1       | non-RPG    | ■    | ■    |      |      |      |      |      |      |      |      |      |      | 0               |
| YNL195C     | YDL223C     |        | ELO1       | non-RPG    |      |      |      |      |      | ■    |      |      |      |      |      |      | 0               |
| YBR020W     | YDR009W     | GAL1   | PHO90      | non-RPG    |      |      |      |      | ■    |      |      |      |      |      |      |      | 0               |
| YCR010C     | YNR002C     | ADY2   | SSK2       | non-RPG    |      |      | ■    |      |      |      |      |      |      |      |      |      | 0               |
| YML116W     | YMR279C     | ATR1   | KIN2       | non-RPG    |      | ■    |      |      |      |      |      |      |      |      |      |      | 0               |
| YAL028W     | YOR324C     | FRT2   | UPS2       | non-RPG    |      |      |      | ■    |      |      |      |      |      |      |      |      | 0               |
| YBR242W     | YGL101W     |        | FAR10      | non-RPG    |      |      |      | ■    | ■    |      |      |      |      |      |      |      | 0               |
| YCL073C     | YKR106W     | GEX1   | CUE5       | non-RPG    | ■    |      |      |      |      |      |      |      |      |      |      |      | 0               |
| YCR091W     | YNR047W     | KIN82  | MSR1       | non-RPG    |      |      |      |      |      | ■    |      |      |      |      |      |      | 0               |
| YDR385W     | YOR133W     | EFT2   | NFI1       | non-RPG    |      | ■    |      |      |      |      |      |      |      |      |      |      | 0               |
| YGR188C     | YJL013C     | BUB1   | YOX1       | non-RPG    |      |      |      |      |      | ■    |      |      |      |      |      |      | 0               |
| YGR243W     | YHR162W     | FMP43  | DIG1       | non-RPG    |      | ■    |      |      |      |      |      |      |      |      |      |      | 0               |
| YHR131C     | YNL144C     |        | KTR6       | non-RPG    |      | ■    |      |      |      |      |      |      |      |      |      |      | 0               |
| YJL137C     | YKR058W     | GLG2   | TOS4       | non-RPG    |      |      | ■    |      |      |      |      |      |      |      |      |      | 0               |
| YAL053W     | YOR365C     | FLC2   | ANB1       | non-RPG    | ■    |      |      |      |      |      |      |      |      |      |      |      | 0               |
| YGR180C     | YJL026W     | RNR4   | CYC1       | non-RPG    |      |      |      |      |      | ■    |      |      |      |      |      |      | 0               |
| YNL087W     | YOR086C     | TCB2   | VHR1       | non-RPG    |      |      |      |      | ■    |      |      |      |      |      |      |      | 0               |
| YDL182W     | YDL131W     | LYS20  | VTC3       | non-RPG    | ■    |      |      |      |      |      |      |      |      |      |      |      | 0               |
| YHR133C     | YNL156C     | NSG1   | ROD1       | non-RPG    |      | ■    |      |      |      |      |      |      |      |      |      |      | 0               |
| YIL114C     | YNL055C     | POR2   | SAP4       | non-RPG    |      |      |      |      |      | ■    |      |      |      |      |      |      | 0               |
| YGR248W     | YHR163W     | SOL4   | GUP2       | non-RPG    |      | ■    |      |      |      |      | ■    |      |      |      |      |      | 0               |
| YGR136W     | YPR154W     | LSB1   | TMA10      | non-RPG    |      |      |      |      |      | ■    |      |      |      |      | ■    |      | 0               |
| YGL158W     | YLR248W     | RCK1   | DBF20      | non-RPG    |      |      |      |      |      | ■    |      |      |      |      |      |      | 0               |
| YOR229W     | YPL139C     | WTM2   | CLB5       | non-RPG    |      | ■    |      |      |      |      |      | ■    |      |      |      |      | 0               |
| YGL063W     | YPL212C     | PUS2   |            | non-RPG    |      |      |      | ■    |      |      |      |      |      |      |      |      | 0               |
| YBR005W     | YDR003W     | RCR1   |            | non-RPG    |      |      |      | ■    |      |      |      |      |      |      |      |      | 0               |
| YBR182C     | YPL089C     | SMP1   | RNP1       | non-RPG    |      | ■    |      |      |      |      |      |      |      |      |      |      | 0               |
| YGR256W     | YHR183W     | GND2   | ARK1       | non-RPG    | ■    |      |      |      |      |      |      |      |      |      |      |      | 0               |
| YIL151C     | YKR096W     |        | SPT23      | non-RPG    |      |      |      | ■    |      |      |      |      |      |      |      |      | 0               |
| YMR233W     | YOR295W     | TRI1   | ALY1       | non-RPG    |      |      |      | ■    |      |      |      |      |      |      |      |      | 0               |
| YBR238C     | YGL107C     |        | TOR2       | non-RPG    |      |      |      |      |      | ■    |      |      | ■    |      |      |      | 0               |
| YGR032W     | YLR342W     | GSC2   | PGM2       | non-RPG    |      |      |      |      | ■    |      |      |      |      |      |      |      | 0               |
| YGL119W     | YBR230W-A   | COQ8   | TGL5       | non-RPG    |      |      |      |      |      | ■    |      |      |      |      |      |      | 0               |
| YIL131C     | YNL068C     | FKH1   | WHI5       | non-RPG    |      |      |      |      |      | ■    |      |      |      |      |      |      | 0               |
| YKR084C     | YOR076C     | HBS1   | ADE17      | non-RPG    |      |      |      |      |      | ■    |      |      |      |      |      |      | 0               |
| YNL098C     | YOR101W     | RAS2   | CAF120     | non-RPG    |      |      |      | ■    |      |      |      |      |      |      |      |      | 0               |
| YMR237W     | YOR299W     | BCH1   | SML1       | non-RPG    |      |      |      | ■    |      |      |      |      |      |      |      |      | 0               |
| YNL108C     | YOR110W     |        | TPS3       | non-RPG    | ■    |      |      |      |      |      |      | ■    |      |      |      |      | 0               |
| YLR277C     | YOR179C     | YSH1   | COT1       | non-RPG    |      |      | ■    |      |      |      |      |      |      |      |      |      | 0               |
| YER031C     | YGL210W     | YPT31  | CUE4       | non-RPG    |      | ■    |      |      |      |      |      |      |      |      |      |      | 0               |
| YIL138C     | YNL079C     | TPM2   | YGK3       | non-RPG    |      | ■    |      |      |      |      |      |      |      |      |      |      | 0               |
| YMR207C     | YNR016C     | HFA1   | YSW1       | non-RPG    |      |      |      |      |      | ■    |      |      |      |      |      |      | 0               |
| YMR182C     | YPL230W     | RGM1   | BSC2       | non-RPG    |      |      |      | ■    |      |      | ■    |      |      |      |      |      | 0               |
| YCL011C     | YNL004W     | GBP2   | BOI2       | non-RPG    |      |      |      |      |      | ■    |      |      | ■    |      |      |      | 0               |
| YBR089C-A   | YPR052C     | NHP6B  |            | non-RPG    |      |      |      | ■    |      |      |      |      | ■    |      |      |      | 0               |
| YDL079C     | YMR139W     | MRK1   | NRG1       | non-RPG    |      |      |      |      |      | ■    |      |      | ■    |      |      |      | 0               |
| YKL091C     | YMR079W     |        | YBP2       | non-RPG    |      | ■    |      |      |      |      |      | ■    |      |      |      |      | 0               |
| YHR047C     | YKL157W     | AAP1   | PYC1       | non-RPG    |      | ■    |      |      |      | ■    |      |      |      |      | ■    |      | 0               |
| YBL091C-A   | YER120W     | SCS22  | UBP5       | non-RPG    |      |      |      |      |      | ■    |      |      | ■    |      |      |      | 0               |
| YDR099W     | YER177W     | BMH2   | CKI1       | non-RPG    |      |      |      |      |      | ■    |      |      | ■    |      |      |      | 0               |
| YDR458C     | YML034W     | HEH2   | TSA1       | non-RPG    |      |      | ■    |      |      |      |      |      | ■    |      |      |      | 0               |
| YBR078W     | YDR055W     | ECM33  |            | non-RPG    |      |      |      |      |      | ■    |      |      | ■    |      |      |      | 0               |
| YDL012C     | YBR016W     |        | SBH1       | non-RPG    | ■    |      |      |      |      |      |      | ■    |      |      |      |      | 0               |
| YDL137W     | YDL192W     | ARF2   | MF(ALPHA)1 | non-RPG    |      |      |      |      | ■    |      |      |      | ■    |      |      |      | 0               |
| YAL030W     | YOR327C     | SNC1   | UGP1       | non-RPG    | ■    |      |      |      |      |      |      |      | ■    |      |      |      | 0               |
| YDR348C     | YHR097C     |        | PRM6       | non-RPG    |      |      | ■    |      |      |      |      |      |      | ■    |      |      | 0               |
| YML056C     | YLR432W     | IMD4   | STB2       | non-RPG    |      | ■    | ■    |      |      |      | ■    |      |      |      |      |      | 0               |
| YNL052W     | YIL111W     | COX5A  | VPS5       | non-RPG    |      |      |      |      |      | ■    |      |      |      | ■    |      |      | 0               |
| Scer_snR17a | Scer_snR17b | SNR17A | DCS2       | non-RPG    |      |      |      |      |      |      |      |      | ■    | ■    |      |      | 0               |
| YHR123W     | YNL130C     | EPT1   | CAD1       | non-RPG    |      |      |      | ■    |      |      |      |      | ■    |      |      |      | 0               |
| YBR082C     | YDR059C     | UBC4   | FAA1       | non-RPG    |      |      |      | ■    |      |      |      |      | ■    |      |      |      | 0               |
| YBL059W     | YER093C-A   |        | INP53      | non-RPG    |      |      |      |      |      | ■    |      |      | ■    |      |      |      | 0               |





| Code | WGD         | Intron evidence               | Intron number     | Gene number |
|------|-------------|-------------------------------|-------------------|-------------|
|      | pre-WGD     | none                          |                   | 0 1         |
|      | pre-WGD     | 1 annotation                  |                   | 1 1         |
|      | pre-WGD     | 1 prediction                  |                   | 1 1         |
|      | pre-WGD     | 1 annotation                  | multiple per gene | 1           |
|      | post-WGD    | none                          |                   | 0 2         |
|      | post-WGD    | prediction                    |                   | 1 2         |
|      | post-WGD    | annotation                    |                   | 1 2         |
|      | post-WGD    | 1 prediction and 1 annotation |                   | 2 2         |
|      | post-WGD    | 2 predictions                 |                   | 2 2         |
|      | post-WGD    | 2 annotation                  |                   | 2 2         |
|      | post-WGD    | annotation                    | multiple per gene | 2           |
|      | post-WGD    | none                          |                   | 0 1         |
|      | post-WGD    | 1 predictions                 |                   | 1 1         |
|      | post-WGD    | 1 annotation                  |                   | 1 1         |
|      | No ortholog | NA                            | NA                | NA          |
