# Supplementary material for: Diverse Forms of RPS9 Splicing Are Part of an Evolving Autoregulatory Circuit
Source: PubMed Central journal article supplement (PMC3315480; doi:10.1371/journal.pgen.1002620), 2012-03-29
Supplement: pgen.1002620.s006.pdf [file pgen.1002620.s006.pdf]

| Organism | Template | Amplicon              | Forward Primer                                                        | Reverse Primer                                                    | Technique       | Figure |
|----------|----------|-----------------------|-----------------------------------------------------------------------|-------------------------------------------------------------------|-----------------|--------|
| Sc       | μJPS1232 | RPL16 Round 1 PCR     | aacaaatcgagaaaatgctgtgtaaccaggtgtgtcattgagGTAAGGGTCATTAGTAGGTCGTTT    | gatgctcattcaaaaaatggattgttagtattatctttaaTTCCTTACCATTAAAGTTGATC    | intron deletion | 2A     |
| Sc       | μJPS1232 | RPL16 Round 2 PCR     | gtaagggctcatttagtagtgcctgttagctccgtgtgctgaagcGATTACCCTGTTATCCCTA      | gatgctcattcaaaaaatggattgttagtattatctttaaTTCCTTACCATTAAAGTTGATC    | intron deletion | 2A     |
| Sc       | μJPS1232 | RPL23A Round 1 PCR    | ataatgtccgtaacgggtgctcaaggtactaagttgaaactcaTAGGTTACCAGTCGGTGCCATCA    | gagaataattttgttagtaaaagcataggggagaaatgagcagatCCTTACCATTAAAGTTGATC | intron deletion | 2A     |
| Sc       | μJPS1232 | RPL23A Round 2 PCR    | ttaggtctaccagtcgggtgccatcatgactgtgctgaacaacagTATTACCCTGTTATCCCTA      | gagaataattttgttagtaaaagcataggggagaaatgagcagatCCTTACCATTAAAGTTGATC | intron deletion | 2A     |
| Sc       | μJPS1232 | RPL24A Round 1 PCR    | tgctattgccaagttaagcaagaccagcaataacttgagagTGATAAAATGAAGGTTGAAATCGAT    | gaaaaaaatgttagtaagctatgctttcataggtagccatTCCTTACCATTAAAGTTGATC     | intron deletion | 2A     |
| Sc       | μJPS1232 | RPL24A Round 2 PCR    | tgataaaatgaaggttgaatcgtattcttttcaggtgccaatGATTACCCTGTTATCCCTA         | gaaaaaaatgttagtaagctatgctttcataggtagccatTCCTTACCATTAAAGTTGATC     | intron deletion | 2A     |
| Sc       | μJPS1232 | RPL2A Round 1 PCR     | ccattctgagcaactaagaaccattagatcaataagcaatgGTAGAGTATTTCGTAACCAAGAAAA    | ctgttagtatacacgatacatttcaacaaaaggaataaaaaaTCCTTACCATTAAAGTTGATC   | intron deletion | 2A     |
| Sc       | μJPS1232 | RPL2A Round 2 PCR     | gtagagtattcgltaaccaagaagggtgctgttctatcttaGATTACCCTGTTATCCCTA          | ctgttagtatacacgatacatttcaacaaaaggaataaaaaaTCCTTACCATTAAAGTTGATC   | intron deletion | 2A     |
| Sc       | μJPS1232 | RPL2B Round 1 PCR     | tttgcataaactcaccagaagaaccacaagtttgaaccaatgGTAGAGTATTTCGTAACCAAGAAAA   | tgtagtaaatattctcgaagatctttcattatcaaatgTCCTTACCATTAAAGTTGATC       | intron deletion | 2A     |
| Sc       | μJPS1232 | RPL2B Round 2 PCR     | gtagagtattcgltaaccaagaagggtgctgttctatctcaGATTACCCTGTTATCCCTA          | tgtagtaaatattctcgaagatctttcattatcaaatgTCCTTACCATTAAAGTTGATC       | intron deletion | 2A     |
| Sc       | μJPS1232 | RPL13A Round 1 PCR    | tttgagaaaagcataglacagcacagcagaatcgtacacaatgCCATTTCGAAGAATTACCAATCTT   | aaaaatgttagtatacacgaaaagtgacgtttcaatagacaccTCCTTACCATTAAAGTTGATC  | intron deletion | 2A     |
| Sc       | μJPS1232 | RPL13A Round 2 PCR    | ccatttccaagaatttaccatcttaagaatcatttcagaagcGATTACCCTGTTATCCCTA         | aaaaatgttagtatacacgaaaagtgacgtttcaatagacaccTCCTTACCATTAAAGTTGATC  | intron deletion | 2A     |
| Sc       | μJPS1232 | RPL34A Round 1 PCR    | aaccaaagatggcccaacgtgttacttcagaagaagaatcACAACACCCCGTTCTAACAAAATCAA    | actttctcattgaaaaatgttagtatacacgaaaatgTCCTTACCATTAAAGTTGATC        | intron deletion | 2A     |
| Sc       | μJPS1232 | RPL34A Round 2 PCR    | acaacaccgcttcaacaaaatcaaggttgttaagaccgaggtGATTACCCTGTTATCCCTA         | actttctcattgaaaaatgttagtatacacgaaaatgTCCTTACCATTAAAGTTGATC        | intron deletion | 2A     |
| Sc       | μJPS1232 | RPL35A Round 1 PCR    | ttattgaccgtagaataggtacagtgagacagtatttcgaaatGCCGGTGTAAAGCTTACGAACTAA   | ccaaattttataacgttagattttattagcactataatgaaTCCTTACCATTAAAGTTGATC    | intron deletion | 2A     |
| Sc       | μJPS1232 | RPL35A Round 2 PCR    | gccgggtgtaagactcagaactaagaacaaatccaaggaacaaCTTACCCTGTTATCCCTA         | ccaaattttataacgttagattttattagcactataatgaaTCCTTACCATTAAAGTTGATC    | intron deletion | 2A     |
| Sc       | μJPS1232 | RPL40B Round 1 PCR    | cccgttcagaagggtaaaagcccaaaaggttcaaaatgcaaatCTTCGTTAAGACTTTGACTGGTAAG  | agtaagcacagacgtgctgctgcatcataaagaagaactTCCTTACCATTAAAGTTGATC      | intron deletion | 2A     |
| Sc       | μJPS1232 | RPL40B Round 2 PCR    | ctcgttgaagacttgactgtgaagcactcatcttggaaatgGATTACCCTGTTATCCCTA          | agtaagcacagacgtgctgctgcatcataaagaagaactTCCTTACCATTAAAGTTGATC      | intron deletion | 2A     |
| Sc       | μJPS1232 | RPS14A Round 1 PCR    | ttaaaccacaaggaqglaagaaccacaagaaccoccatgTactaACGTTGTTCAAGCTCGTGACAATTC | atatcaaacglaagtgttagtataccaaaagttttttttTTCCTTACCATTAAAGTTGATC     | intron deletion | 2A     |
| Sc       | μJPS1232 | RPS14A Round 2 PCR    | acgttttcaagctcgtgacaatcccaagttttgttcttcaGTATTACCCTGTTATCCCTA          | atatcaaacglaagtgttagtataccaaaagttttttttTTCCTTACCATTAAAGTTGATC     | intron deletion | 2A     |
| Sc       | μJPS1232 | RPS14B Round 1 PCR    | agactgaatcaacaactcccaataaagaaatggttaagcACCTTGTTCAGCTCGCGATAACTC       | aacgagaactctcttttctgattataaaaaataaacgaaagTCCTTACCATTAAAGTTGATC    | intron deletion | 2A     |
| Sc       | μJPS1232 | RPS14B Round 2 PCR    | acctgttcaagctcgcgataactcgaagcttgggtgccaGATTACCCTGTTATCCCTA            | aacgagaactctcttttctgattataaaaaataaacgaaagTCCTTACCATTAAAGTTGATC    | intron deletion | 2A     |
| Sc       | μJPS1232 | RPS21B Round 1 PCR    | aaagaatatcaataagccaaaalggaaaagataaggttcaatGTTGAATTATATGTTCCAAGAAAGT   | acatttgcctatattcttgaataattattctgacatgaaTCCTTACCATTAAAGTTGATC      | intron deletion | 2A     |
| Sc       | μJPS1232 | RPS21B Round 2 PCR    | gttgaattatatttccaagaaggttctgctaccacaagaatcGATTACCCTGTTATCCCTA         | acatttgcctatattcttgaataattattctgacatgaaTCCTTACCATTAAAGTTGATC      | intron deletion | 2A     |
| Sc       | μJPS1232 | RPS23A Round 1 PCR    | aggttgaactctgctagaagactcgtgctccagaagaacaaCCGTTGGCCGAAAACACTACAAG      | aaatgattcgttgaataaaacggcctcctgactctgagttTCCTTACCATTAAAGTTGATC     | intron deletion | 2A     |
| Sc       | μJPS1232 | RPS23A Round 2 PCR    | ccgttggccgaaaacaactacaagaagagatttggglactcGATTACCCTGTTATCCCTA          | aaatgattcgttgaataaaacggcctcctgactctgagttTCCTTACCATTAAAGTTGATC     | intron deletion | 2A     |
| Sc       | μJPS1232 | RPS8A Round 1 PCR     | tttggactcacaagaagacttataaacacaccaggacaaaaTTACAAAATGGGTATTTCTCGTGAT    | taaaataaagaacgtacaaaagtcgggaatttttctatctTCCTTACCATTAAAGTTGATC     | intron deletion | 2A     |
| Sc       | μJPS1232 | RPS8A Round 2 PCR     | ttacaaaatgggtatttctcgtgattctgctcacaagaagctcGATTACCCTGTTATCCCTA        | taaaataaagaacgtacaaaagtcgggaatttttctatctTCCTTACCATTAAAGTTGATC     | intron deletion | 2A     |
| Sc       | μJPS1232 | RPS9A Round 1 PCR     | aaaactaatcaacagacaagaatacaaaagatatacaaatcGAGCCCAAGAACAATTCGAAGAC      | gtagcgcctcttttcaaacgaaatgagagatcaagatcaTCTTACCATTAAAGTTGATC       | intron deletion | 2A     |
| Sc       | μJPS1232 | RPS9A Round 2 PCR     | gagccccaagaacatattccaagactactcaccacaagaagacGATTACCCTGTTATCCCTA        | gtagcgcctcttttcaaacgaaatgagagatcaagatcaTCTTACCATTAAAGTTGATC       | intron deletion | 2A     |
| Sc       | μJPS1232 | RPS9B Round 1 PCR     | aaagaagaagcaacaagacaactaagcaactaagcaaatGAGCTCCAAAGACTTACTCTAAGAC      | ttagtcaaaagtttcccggaacaaaagctcgaagggcccaagTCCTTACCATTAAAGTTGATC   | intron deletion | 2A     |
| Sc       | μJPS1232 | RPS9B Round 2 PCR     | gagctccaagaactactcaagactactctcaccacaagaagacGATTACCCTGTTATCCCTA        | ttagtcaaaagtttcccggaacaaaagctcgaagggcccaagTCCTTACCATTAAAGTTGATC   | intron deletion | 2A     |
| Sc       | cDNA     | Total RPS9A           | ccaacatctcattcctq                                                     | aaaaatcaacacaattattctca                                           | qPCR            | 2D     |
| Sc       | cDNA     | Total RPS9B           | gctagaagaagacgctgctaga                                                | tgaaaaatgatcgtgattgga                                             | qPCR            | 2D     |
| Sc       | cDNA     | SCR1                  | aggaatccgtctctctgct                                                   | TGGATAAAATCCCCTAACA                                               | qPCR            | 2D     |
| Dm       | cDNA     | UPF1_1                | GGGCGGGTgctctcgaagttgttc                                              | GGGCGGGTgtagatcgcacgcaagaca                                       | RNAi            | 3A     |
| Dm       | cDNA     | UPF1_2                | GGGCGGGTtgctcctacggaactcac                                            | GGGCGGGTccagactcctctgttgaac                                       | RNAi            | 3A     |
| Dm       | cDNA     | HNRNPLL               | GGGCGGGTgatcactcgcgcaagaaata                                          | GGGCGGGTaccagagggattctctccat                                      | RNAi            | 3A     |
| Dm       | cDNA     | RPLP0                 | agaaagaaggaagcacaag                                                   | ccgaaaccatcatctgctc                                               | qPCR            | 3B     |
| Dm       | cDNA     | RPS9 PTC+             | tgactcgttcacaccaatc                                                   | tcaagtctgcccattgatt                                               | qPCR            | 3B     |
| Dm       | cDNA     | Total exogenous RPS9  | gtcgcgtcaagaggaagaac                                                  | cctgctagctcactcacc                                                | qPCR            | 3B     |
| Dm       | cDNA     | Total endogenous RPS9 | gtcgcgtcaagaggaagaac                                                  | tcaagtctgcccattgatt                                               | qPCR            | 3B     |
| Dm       | cDNA     | GAPDH1                | cttctcagcaccaccatt                                                    | accgaactctgctgacc                                                 | qPCR            | 3B     |
| Dm       | cDNA     | RPS9 cDNA ORF         | CACCatggtgaacgcccatac                                                 | ttagtctcctcctctcaagc                                              | subcloning      | 3B     |
